# Supplementary material for: Long-term health-related quality of life after trauma with and without traumatic brain injury: a prospective cohort study
Source: Springer Nature journal article supplement (doi:10.1038/s41598-023-30082-4), 2023-02-20
Supplement: MOESM1 [file 41598_2023_30082_MOESM1_ESM.pdf]

## Supplementary table 1: ICD-10 definition of TBI

| Table 1. ICD-10 codes defining TBI                                                                                                                                                                     |                                                      |
|--------------------------------------------------------------------------------------------------------------------------------------------------------------------------------------------------------|------------------------------------------------------|
| S02.0                                                                                                                                                                                                  | Fracture of vault of skull                           |
| S02.1                                                                                                                                                                                                  | Fracture of base of skull                            |
| S02.3                                                                                                                                                                                                  | Fracture of orbital floor                            |
| S02.7                                                                                                                                                                                                  | Multiple fractures involving skull and facial bones  |
| S02.8                                                                                                                                                                                                  | Fractures of other skull and facial bones            |
| S02.9                                                                                                                                                                                                  | Fracture of skull and facial bones, part unspecified |
| S06.0                                                                                                                                                                                                  | Concussion                                           |
| S06.1                                                                                                                                                                                                  | Traumatic cerebral oedema                            |
| S06.2                                                                                                                                                                                                  | Diffuse brain injury                                 |
| S06.3                                                                                                                                                                                                  | Focal brain injury                                   |
| S06.4                                                                                                                                                                                                  | Epidural haemorrhage                                 |
| S06.5                                                                                                                                                                                                  | Traumatic subdural haemorrhage                       |
| S06.6                                                                                                                                                                                                  | Traumatic subarachnoid haemorrhage                   |
| S06.7                                                                                                                                                                                                  | Intracranial injury with prolonged coma              |
| S06.8                                                                                                                                                                                                  | Other intracranial injuries                          |
| S06.9                                                                                                                                                                                                  | Intracranial injury, unspecified                     |
| <b>Supplementary table 1.</b> Table of ICD-10 codes defining TBI. All intracranial lesions and fractures of the skull are included. Facial fractures and fractures of the cervical spine are excluded. |                                                      |
